# Does Education Sculpt Healthcare Choices? Exploring Factors Influencing Healthcare Utilization Among Female Youths in Eight Low and Lower-Middle-Income Countries

<sup>¶</sup>MD Nahid Hassan Nishan <sup>ID</sup><sup>1\*</sup>, <sup>¶</sup>Khadiza Akter <sup>ID</sup><sup>2</sup>, <sup>¶</sup>Afroza Sharmin <sup>ID</sup><sup>3</sup>, Tazmin Akter Tithi <sup>ID</sup><sup>2</sup>, M Z E M Naser Uddin Ahmed <sup>ID</sup><sup>1</sup>

<sup>1</sup>Department of Public Health, North South University, Dhaka, Bangladesh

<sup>2</sup>Department of Nursing, International University of Business Agriculture and Technology, Dhaka, Bangladesh

<sup>3</sup>Department of Nursing, HBH International Nursing College, Dhaka, Bangladesh

\*nissan0808@yahoo.com, khadiza989.155@gmail.com, sharminafroz.05@gmail.com, tithibsn@gmail.com, dr.naser.9@gmail.com

\* Corresponding Author

Department of Public Health, North South University, Dhaka, Bangladesh.

E-mail address: nissan0808@yahoo.com (MNHN)

<sup>¶</sup>These authors contributed equally to this work.

## 31 **Abstracts**

### 32 **Introduction**

33 Emphasizing the global commitment to universal health coverage, this research addresses  
34 geographical variations and challenges faced by young females across low and lower-middle-  
35 income countries. Therefore, the objective of this study is to determine the factors that influence  
36 the decision-making of young females when it comes to seeking healthcare services in low or  
37 lower-middle-income countries.

### 38 **Methodology**

39 We examined healthcare usage among female youth across eight countries. We used data from the  
40 DHS and employed regression and Chi<sup>2</sup> tests for our analysis. Our focus was on females aged 15  
41 to 24 and their visits to healthcare facilities. To ensure the validity of our findings, we used  
42 weighted sampling to represent the population.

### 43 **Results**

44 We had a total sample of 51,298 female youth groups between the ages of 15 and 24 who  
45 participated in our study. When it comes to the demographics of the participants, most of those in  
46 the 15-19 age group were from Burkina Faso (54.26%), while most of those in the 20-24 age group  
47 were from Ghana (50.19%). The impact of education varied across countries; primary education  
48 led to increased healthcare utilization in Kenya, Tanzania, and Cambodia, but unexpected trends  
49 were observed in Burkina Faso.

### 50 **Conclusions**

51 Education significantly influences healthcare utilization, both primary and secondary education  
52 positively impacting this. Rural residents face challenges accessing timely healthcare.  
53 Geographical challenges, like diseases and limited accessibility, contribute to varied healthcare  
54 usage in Kenya and the Philippines. Addressing infrastructure issues is critical, emphasizing  
55 education and promoting transparency to enhance healthcare equity.

### 56 **Keywords**

57 *Female youth, Geographical variations, Healthcare utilization, LMIC, Universal health coverage*

## 58 **Introduction**

59 Healthcare utilization encompasses the degree to which people use the services of the healthcare  
60 system [1]. Several factors determine this healthcare utilization, and it can be broadly categorized  
61 into two types: service-related and user-related factors. Service factor refers to the accessibility,  
62 availability, and quality of the service. Conversely, user factors include individual characteristics  
63 such as age, gender, other demographics, specific health needs, and perceived beliefs regarding  
64 their health and the healthcare system [1,2]. Though several factors determine healthcare  
65 utilization, the ultimate goal of this healthcare utilization is to protect and promote people's health  
66 [1]. More importantly, there is a global desire to ensure healthcare utilization for individuals  
67 irrespective of their barriers. This commitment is a crucial target that has been declared in the 2030  
68 Agenda [3]. Specifically, this falls under the Sustainable Development Goal (SDG), and the  
69 number three goal emphasizes the achievement of universal health coverage to enhance health  
70 promotion and well-being for people of all ages, irrespective of their demographic characteristics  
71 [4]. So, different organizations (for example, UNDP) and governments are working progressively  
72 to achieve this goal [5]. It is believed that the functional healthcare system is very crucial to  
73 reaching the SDG goal and supporting universal health coverage by ensuring healthcare utilization  
74 [6]. However, evidence shows that the rate of healthcare utilization varies due to geographical  
75 differences, and this rate could mostly vary in low and lower-middle-income countries across  
76 different population groups [7–9]. Their financial hardship and the underdeveloped healthcare  
77 system pose a significant barrier [6]. Considering this issue, global experts are giving special  
78 attention to low and lower-middle-income countries so that they can have better healthcare  
79 utilization and ensure quality healthcare [10].

80 As this progressed, studies showed that the majority focused on adult age group people, children  
81 under five years old, and often the elderly. For this, there are several incorporated activities in low  
82 and lower-middle-income countries, such as insurance coverage for maternal healthcare utilization  
83 and primary healthcare services are introduced [11–13]. Even though there have been  
84 improvements over the three decades, children and teenagers in low-income and middle-income  
85 countries are still not achieving their full health potential [14]. This is more intense, in low and

86 lower-middle-income countries as this creates burden in many aspect of utilization of healthcare  
87 among young female groups [15]. It is crucial to focus on them as studies have shown they are  
88 vulnerable to several adverse health consequences, such as poor reproductive health, chronic  
89 diseases, complications from substance abuse, mental health disorders, behavioral complexity,  
90 suicidal ideation, and many more [14,16,17]. Additionally, these groups face tremendous  
91 challenges in seeking healthcare services, and often, in several cases, it is difficult for the female  
92 youth as they face more challenges than adult females while receiving healthcare services [18].  
93 Youth groups in lower-middle-income countries face a range of health challenges that affect  
94 different aspects of their well-being. Accidental injuries and road traffic accidents are a cause of  
95 death and disability among them. Infectious diseases like HIV, tuberculosis, and respiratory  
96 infections still impact adolescents, while the ongoing COVID-19 pandemic adds difficulties to  
97 their well-being [19]. Early pregnancy and childbirth environmental risks, overweight issues, and  
98 malnutrition add to the complexity of health problems faced by this group [19]. In addition, the  
99 long distance of healthcare makes it difficult for young females to receive proper healthcare  
100 services [20]. So, it can be seen that there are multiple factors that influence the reception of  
101 healthcare services among youth groups, and this may not be the same across low- and lower-  
102 middle-income countries. This raises the question of which factors mostly play a vital role in  
103 utilizing health care among young female groups in those countries. If we can identify those crucial  
104 factors that are mostly contributing to healthcare utilization among low and lower-middle-income  
105 countries, this finding will help the stakeholders and policymakers to consider more effective  
106 implementation and intervention to reach the SDG goal properly, and this poses a great novelty in  
107 this study. After through literature review, we identified this research gap and therefore, this study  
108 aims to identify the factors influencing the female youth's decision to receive healthcare services  
109 in low- and lower-middle-income countries.

## 110 **Method and Materials**

111 We relied on the secondary dataset from the Demographic and Health Survey (DHS) to conduct  
112 this study. The DHS contains data from 108 countries globally [21]. However, we chose 62  
113 countries categorized as low-income and lower-middle-income countries by the World Bank  
114 ranking system [22]. Eight of these nations have been chosen because they met our interest

115 criterion: the utilization of healthcare facilities among youth groups. The countries enlisted for this  
116 study are

117 **Table 1: List of Countries Used In this Study**

| Country       | Year           |
|---------------|----------------|
| Burkina Faso  | 2021 [23]      |
| Côte d'Ivoire | 2021 [24]      |
| Ghana         | 2022 [25]      |
| Kenya         | 2022 [26]      |
| Tanzania      | 2022 [27]      |
| Cambodia      | 2021-2022 [28] |
| Nepal         | 2022 [29]      |
| Philippines   | 2022 [30]      |

118

119 Cross-sectional study techniques have been followed to complete this study using the data  
120 extracted from the most updated DHS dataset from above 2020 though we started searching the  
121 dataset from 2017 but none of them contain all the variables suitable for our study. This DHS  
122 survey usually follows a two-step sampling approach to get the data from a desired country. Firstly,  
123 it selects the household in-cluster enumeration areas (EAs), and then a defined number of  
124 households are chosen from each cluster. The DHS collaborates and empowers the national  
125 implementing agencies through regional workshops so that they can ensure the training and other  
126 necessary requirements for the field staff to collect data effectively from the household. For  
127 detailed information regarding their study site, population, data collection, and sampling process,  
128 you may visit [31].

129 For this study, we considered the individual recorded information (IR files) obtained from the DHS  
130 as it has access to data of females aged 15 to 49 years. Our goal was to get information regarding  
131 whether the young generation (female) has utilized health facilities in recent years, so we took the  
132 variable “visited a health facility in the last 12 months”. We restricted it to those above 24 years.  
133 We also ensure that there is no presence of missing values. Moreover, any unwanted variables  
134 have also been removed. Additionally, weight has been applied to the sample of all countries to  
135 adjust them according to the population sizes and survey years.

## 136 **Dependent and Independent Variables**

137 The outcome variable we have used for this study is whether the respondent visited a healthcare  
138 facility in the last twelve months. Depending upon several condition there could be many reasons

139 an individual will visit the health care settings [32]. However, for this current study, we only  
140 considered a particular group (youth) who received healthcare services through healthcare visit.  
141 Moreover, we kept the outcome variable in a binary approach with values 1 and 0 for analysis  
142 based on the study objectives. Here, value “1” refers to visited healthcare facilities in the last  
143 twelve months, and “0” refers otherwise.

144 Initially, a total of 11 variables were incorporated as independent variables for this current study  
145 due to their access to DHS in these seven countries. However, within these 11 variables, we have  
146 modified it to seven explanatory variables to align with our research interest. These variables  
147 encompass age, residence, wealth index, personal access to vehicle, reaching time to nearest health  
148 care facility, and mass media engagement. The primary explanatory variable is the level of  
149 education. For our analysis, we have categorized these variables in a specific way. For example,  
150 an ordinal scale has been employed for the age variable: "15-19 Age group" and "20-24 Age  
151 group". The education variable is categorized as individual has No education, Primary, Secondary,  
152 and Higher. The resident has kept a dichotomy: Urban and Rural.

153 Furthermore, the wealth index is categorized as Poor, Middle, and Rich. Personal access to a  
154 vehicle is determined by combining three variables (household having a bicycle, household having  
155 motorcycle/scooter, household having car/truck) and then categorizing them as "Yes"- have access  
156 and "No" have no access. Additionally, reaching time to the nearest healthcare facility has been  
157 categorized as "Within 1 hour", "2-3 Hours," and "More than 3 hours". Finally, mass media  
158 engagement has been categorized as "Present" media engagement" and "Absent" media  
159 engagement by merging three variables (frequency of reading newspapers or magazines, frequency  
160 of watching TV, and frequency of listening to radio).

## 161 **Data analysis**

162 To analyze our data thoroughly, we relied on Stata, a statistical software version 17. As DHS has  
163 a two-stage cluster sampling design, there is a potential for unequal sampling probability,  
164 clustering, and stratification. However, we applied the weighting technique through survey (Svy)  
165 commands to resolve this issue. The weighting technique enables the fitting of a proper statistical  
166 model by ensuring the representativeness of the survey data, and DHS highly recommends this  
167 technique [33].

168 We begin our analysis by calculating descriptive statistics to present a comprehensive overview of  
169 the variables. Afterward, we did the bivariate analysis. We checked the association through the  
170 Chi<sup>2</sup> test, which helped us to assess the explanatory variables' significance level. We used the (<sup>‡</sup>)  
171 symbol to highlight the Chi<sup>2</sup> significant strengths. We individually examined all explanatory  
172 variables to assess their association with the outcome variable and found that all of the independent  
173 variables we chose were suitable for multivariate analysis as their *P*-value were < 0.05. Moving  
174 forward to multivariate analysis, we applied logistic regression, carefully observed the *P*-value,  
175 and presented the significance with the adjusted odd ratio (AOR). To show multivariate AOR  
176 strength, we used (\*), where more stars represent more strength. We considered a 95% confidence  
177 interval for this multivariate analysis. In addition, with these statistical analyses, we have also  
178 checked multicollinearity and confirmed there was no presence of multicollinearity, and the model  
179 was fitted properly for our analysis. Lastly, we constructed tables to present our study findings.

## 180 **Results**

181 We got a total of 51,298 weighted youth aged 15 to 24 participants in our study. In terms of  
182 demographic characteristics, most participant's 15-19-year age group were in Burkina Faso  
183 (54.26%), and most participants from the 20-24 years group were from Ghana (50.19%). The  
184 majority of the participants from Nepal live in urban areas (68.09%), and most Burkina Faso  
185 participants are from rural areas (64.84%). About (43.90%) received primary education, whereas  
186 (68.86%) and (27.90%) received secondary and higher education in the Philippines. More  
187 information is in **Table 2**

### 188 **Insert Table 2 Here**

189  
190 In a bivariate analysis, there is a highly significant association (*p*-value <0.001) present between  
191 the age group and visiting healthcare to receive healthcare facilities, and this significance is present  
192 in all of the countries of our study. Moreover, the residents have a strong association with outcomes  
193 in Cambodia and the Philippines (*p*-value <0.001), but Côte d'Ivoire showed a weak statistical  
194 association (*p*-value <0.05). Furthermore, education showed a high statistically significant  
195 association (*p*-value <0.001) in multiple countries (Burkina Faso, Côte d'Ivoire, Ghana, Kenya,  
196 Cambodia, and the Philippines). Additionally, the wealth index and media engagement also  
197 showed a high statistically significant association (*p*-value <0.001) in Kenya, Cambodia, and the

198 Philippines, but a moderate association ( $p$ -value  $<0.01$ ) was only found for the wealth index and a  
199 weak association ( $p$ -value  $<0.05$ ) for media engagement in Burkina Faso. Other variables include  
200 access to personal transport, having a moderate association ( $p$ -value  $<0.01$ ) in Tanzania and Nepal,  
201 and reaching time to nearby healthcare facilities, which only showed a weak association ( $p$ -value  
202  $<0.05$ ) in Nepal.

203 **Insert Table 3 Here**

## 204 **Demographic Factor**

205 In our study, age plays a significant role in healthcare utilization among youth. Individuals aged  
206 20-24 years across Burkina Faso, Côte d'Ivoire, Ghana, Kenya, Tanzania, Cambodia, Nepal, and  
207 the Philippines showed a higher likelihood of accessing healthcare services compared to the 15-  
208 19 years age group. The adjusted odds ratios are respectively: (AOR: 3.44 CI:3.04-3.89), (AOR:  
209 2.75 CI: 2.39-3.17), (AOR: 2.41 CI: 2.08-2.76), (AOR: 2.46 CI: 2.11-2.87), (AOR: 2.93, CI: 2.55-  
210 3.37), (AOR: 2.25, CI: 1.91-2.64), (AOR: 2.64, CI: 2.32-3.01), and (AOR: 3.87, CI: 3.22-4.64)  
211 and all of them are highly statistically significant.

212 The important key factor, education, and its influence on healthcare utilization are evident in  
213 Burkina Faso, Côte d'Ivoire, Kenya, Tanzania, and Cambodia. In Kenya, Tanzania, and Cambodia,  
214 individuals with primary education showed a higher likelihood (AOR 2.07 CI:1.50-2.85), (AOR  
215 1.36 CI:1.09-1.68), and (AOR 1.55 CI:1.01-2.37) of visiting healthcare facilities compared to those  
216 without education except Burkina Faso where there is a lower likelihood in primary education  
217 (AOR 0.84 CI:0.72-0.98) compared to those without education, with statistical significance.  
218 Additionally, Burkina Faso also showed a lower likelihood (AOR 0.83 CI:0.73-0.95) of secondary  
219 education compared to those who are not educated, but Côte d'Ivoire, Kenya, and Tanzania showed  
220 the opposite, where they showed a higher likelihood of healthcare utilization (AOR 1.31 CI:1.07-  
221 1.57), (AOR 2.58 CI:1.88-3.54) and (AOR 1.42 CI:1.11-1.80), respectively. Only Kenya showed  
222 a higher likelihood of (AOR 2.16 CI:1.48-3.17) healthcare utilization among higher educated  
223 individuals compared to those who were not educated, and this is also highly significant.

224 However, in terms of residents, there is an increased likelihood of healthcare utilization seen in  
225 rural individuals in the Sub-Saharan African region: Kenya and in Southeast Asian region:



226 Philippines with (AOR 1.41 CI: 1.17-1.70) and (AOR 1.24 CI: 1.00-1.53) compared to the urban  
227 people.

## 228 **Socio-economic factor**

229 In the wealth index context, Burkina Faso and Cambodia showed a significant role. In Burkina  
230 Faso, the poor have a lower likelihood (AOR 0.73 CI:0.62-0.87), and in Cambodia rich also have  
231 a lower likelihood (AOR 0.73 CI:0.59-0.92) of healthcare utilization compared to the middle class,  
232 and both are significant.

233 In Tanzania and Cambodia, those who have personal transport both have a lower likelihood (AOR  
234 0.84 CI:0.72-0.99) and (AOR 0.71 CI:0.59-0.82) of healthcare utilization compared to those who  
235 do not, and this result is also statistically significant.

236

## 237 **Healthcare accessibility**

238 **Table 4** shows a significant association across all the regions of our study between Urban-rural  
239 settings and Nearby healthcare reaching time. There is a noticeable trend across all of the regions,  
240 which is that there is a higher percentage of individuals who live in urban regions have reached  
241 within 1 hour compared to those who live in rural areas.

242 **Insert Table 4 Here**

243

244 On the other hand, multivariate analysis showed in Côte d'Ivoire that those who require more than  
245 3 hours to reach nearby health facilities have a lower likelihood (AOR 0.27 CI:0.11-0.62) of  
246 healthcare utilization compared to those who have within 1-hour reaching time, and this is  
247 moderately statistically significant.

248 **Insert Table 5 Here**

## 249 **Discussions**

250 The comprehensive exploration of healthcare utilization among youth delves into intricate  
251 dynamics shaped by socio-demographic contexts, revealing variations across countries. The  
252 majority of participants are from the 15-19 age group, compared to the 20-24 age group, and  
253 most of them are from Burkina Faso. Additionally, most youths live in rural areas in the same  
254 country.

255 The study found a significant association across all regions of our study concerning urban-rural  
256 settings and the time required to reach nearby healthcare facilities. A notable trend has been  
257 observed: a higher percentage of individuals residing in urban regions reach healthcare facilities  
258 within one hour compared to those living in rural areas. This can be justified by several  
259 interconnected factors, including urban areas typically receiving benefits from more developed  
260 infrastructure, including better road networks and transportation systems. The accessibility of  
261 healthcare allows urban residents to cover shorter distances and reach medical services more  
262 quickly. Also, the concentration of healthcare facilities tends to be higher in urban areas. This  
263 spatial distribution results in greater availability of medical services within close proximity in  
264 urban areas, facilitating prompt access. This may suggest that rural areas have fewer healthcare  
265 facilities, and individuals might need to travel more distances to reach the nearest center [34].

266 Across all the regions, there is a strong association between age group and healthcare utilization,  
267 and this is also reflected in multivariate analysis. In Burkina Faso, Côte d'Ivoire, Ghana, Kenya,  
268 Tanzania, Cambodia, Nepal, and Philippines, showed a higher likelihood of accessing healthcare  
269 services among the 20-24 years age group compared to the 15-19-year age group. This may suggest  
270 that the 20-24 years group may attribute to increased health awareness, emerging health needs,  
271 autonomy in decision-making, education, and improved access to resources during early  
272 adulthood, whereas the 15-19 years group may not have access to such resources and they may  
273 pose fear to do all this by themselves [35–37].

274 Throughout the study, we found education is one of the significant factors that influence healthcare  
275 utilization most. In Kenya, Tanzania, and Cambodia, individuals with primary education showed  
276 a higher likelihood of healthcare utilization compared to those without education. This suggests  
277 that having an education can benefit to receive more healthcare facilities and is supported by the  
278 belief that basic education helps develop health awareness and knowledge [38]. When individuals  
279 have received the education, they may acquire a foundation of health-related information, which  
280 empowers them to prioritize their well-being and seek appropriate healthcare services. Health  
281 literacy encompasses skills like accessing, understanding, evaluating, and applying health  
282 information. Through primary education this equips individuals with these skills enabling them to  
283 make decisions regarding their health [39]. In countries such as Côte d'Ivoire, Kenya, and  
284 Tanzania, individuals who have secondary education are more inclined to access healthcare

285 services. This indicates that advanced education has a positive impact on their health-seeking  
286 behavior. In Africa, youth inequality and limited access to secondary education is very common  
287 issue for a long time. However, Innovations in Secondary Education (ISE) initiative addresses this,  
288 allocated US \$35.5 million and doing twelve projects in several countries, including Côte d’Ivoire,  
289 Kenya, Malawi, Rwanda, Senegal, Tanzania, and Uganda. This could be a significant promoter of  
290 secondary education among youth in those regions, which could be a success of the program  
291 promoting secondary education and empowering youth with skills, thus making them dependent  
292 on receiving more healthcare utilization [40]. Moreover, in Kenya, youth who have received a  
293 higher education are more inclined to make use of healthcare services. Research indicates that  
294 individuals with higher education tend to have better health and longer lifespans compared to those  
295 with lower levels of education [41]. This suggests that advanced education equips individuals with  
296 thinking skills and a deeper comprehension of health issues, motivating them to seek out healthcare  
297 services. Despite this, Burkina Faso showed an inverse pattern in terms of both primary and  
298 secondary education. Burkina Faso showed that those with primary or secondary education have  
299 a lower likelihood of utilizing healthcare compared to those who are not educated. This is a very  
300 interesting finding. One possible reason may be that education may have improved the knowledge  
301 of individuals related to healthcare; thus, educated individuals take self-care rather than trying to  
302 go into healthcare rapidly compared to non-educated individuals [42]. Also, female youth may  
303 face restrictions to going outside rapidly, which could be due to their cultural beliefs, which can  
304 cause lower healthcare utilization [42].

305 Another key factor is residents, which showed an increased likelihood of healthcare utilization  
306 seen in rural individuals in Kenya and the Philippines compared to urban people. In Kenya's  
307 context, remote regions may have a prevalence of infectious diseases [43]. Also, other conditions,  
308 including poor hygiene and suboptimal physical activity, may cause a burden among rural people  
309 compared to urban people, which may be a triggering factor for a higher likelihood of healthcare  
310 utilization.

311 On the other hand, the archipelagic nature of the Philippines presents obstacles to healthcare  
312 accessibility in isolated rural areas [44]. In rural settings, many may live in distinct mountain areas  
313 where healthcare access is not easy. Furthermore, there are more frequency of diseases and also,  
314 they don't have access to other health facilities like pharmacy, shop where they can buy items for

315 self-medication. As treatment may be available only in certain healthcare settings, which could be  
316 the possible reason that more female youth frequently rely on healthcare visits which are only  
317 available to them.

318 Moving onto the socio-economic context, in Burkina Faso, poor individuals show a lower  
319 likelihood of healthcare utilization compared to the middle class as they could be rooted in  
320 financial barriers. They may need help in affording healthcare, possibly due to the costs associated  
321 with accessing medical services. Since young women also do not earn enough, they may face  
322 financial issues, which may be the possible reason for less healthcare utilization [45,46]. In  
323 Cambodia, the rich are less likely to seek healthcare, as the wealthy can afford nutritional food and  
324 better accommodation which may cause lower prevalence of diseases among them. Moreover, low  
325 trust in the healthcare system, which has been affected by corruption, poor quality, and lack of  
326 accountability may hinder finding interest on receiving healthcare services in general [47]. Shifting  
327 focus to personal transport in Tanzania and Cambodia, the lower likelihood of healthcare  
328 utilization among those with access to personal transportation may opt for more distant to get  
329 healthcare facilities. This may create lack of interest on receiving healthcare services among youth  
330 female as it might not be easy for them to go frequently with their personal transport as they may  
331 need to rely on other members of their family for this [48].

332 The observed trend in Côte d'Ivoire, where individuals requiring more than 3 hours to reach nearby  
333 health facilities exhibit a lower likelihood of healthcare utilization compared to those within a 1-  
334 hour to reach. Côte d'Ivoire's diverse terrain often poses obstacles to timely access to healthcare  
335 services. Moreover, lack of enough healthcare facilities can lead to such issues. People who have  
336 to travel distances may experience challenges with the transportation system, such as poorly  
337 maintained roads or a lack of convenient public transportation choices [49]. This detailed analysis  
338 highlights the relationship between socio-economic factors and geographical obstacles in  
339 influencing the way young people access healthcare services.

## 340 **Limitations**

341 The study's reliance on self-reported data which may introduces subjective biases. The temporal  
342 scope is limited to post-2020 data. Omission of countries due to insufficient data affects

343 generalizability as representation of eight countries may not capture broader regional nuances.  
344 Uneven sample sizes across regions may introduce biases in precision and representativeness. Lack  
345 of exploration into participants' cultural backgrounds misses insights into cultural influences on  
346 healthcare utilization patterns. These limitations suggest areas for future research to enhance  
347 understanding.

## 348 **Conclusions**

349 This research shows that education plays a significant role in healthcare usage across the countries,  
350 with primary and secondary education positively influencing it. The connection between residence  
351 and the time it takes to get to healthcare facilities highlights difficulties among rural individuals  
352 when it comes to accessing services promptly. It's fascinating that as young adults transition into  
353 adulthood between the ages of 20 and 24, they tend to become more conscious about their health,  
354 embrace their independence, and gain access to resources. However, Burkina Faso presents a  
355 contrast where educated individuals may prioritize self-care over seeking medical attention.  
356 Additionally, educated youth female may face barriers due to gender and cultural beliefs Burkina  
357 Faso, which result in lower healthcare utilization. Geography, diseases and limited accessibility,  
358 may further contributed to increased utilization of healthcare services in areas in Kenya and the  
359 Philippines. The situation in Côte d'Ivoire highlights an urgent need for intervention in the poorly  
360 maintained roads and convenient public transportation. Considering these findings, it is  
361 recommended that we focus on initiatives to enhance healthcare facilities in regions, overcome  
362 cultural and gender-related obstacles among female youth, and foster trust in health systems by  
363 promoting transparency and accountability. It is also important to focus on promoting female  
364 education and health literacy in different regions. Initiatives such as the UNESCO strategy on  
365 education for health and well-being should address education to empower female. Policymakers  
366 and healthcare professionals should work together to guarantee that health resources are distributed  
367 equitably and minimize the obstacles to healthcare facilities among youth.

## 368 **Abbreviation**

| ABBREVIATION | FULL FORM           |
|--------------|---------------------|
| AOR          | Adjusted Odds Ratio |

|             |                                      |
|-------------|--------------------------------------|
| <b>DHS</b>  | Demographic and Health Survey        |
| <b>EA</b>   | Enumeration Areas                    |
| <b>ISE</b>  | Innovations in Secondary Education   |
| <b>SDG</b>  | Sustainable Development Goal         |
| <b>UNDP</b> | United Nations Development Programme |

369

## 370 Acknowledgments

371 We thank the Demographics and Health Survey (DHS) for providing us with access to their survey  
372 data.

## 373 Reference

- 374 1. Orbell S, Schneider H, Esbitt S, Gonzalez JS, Gonzalez JS, Shreck E, et al. Health Care  
375 Utilization. In: Gellman MD, Turner JR, editors. Encyclopedia of Behavioral Medicine. New  
376 York, NY: Springer New York; 2013. pp. 909–910. doi:10.1007/978-1-4419-1005-9\_885
- 377 2. Fernández-Olano C, Hidalgo JDL-T, Cerdá-Díaz R, Requena-Gallego M, Sánchez-Castaño  
378 C, Urbistondo-Cascales L, et al. Factors associated with health care utilization by the elderly  
379 in a public health care system. *Health Policy*. 2006;75: 131–139.  
380 doi:10.1016/j.healthpol.2005.02.005
- 381 3. World Health Organization. A vision for primary health care in the 21st century. World  
382 Health Organization; 10 Dec 2018 [cited 29 Jan 2024]. Available:  
383 <https://www.who.int/publications/i/item/WHO-HIS-SDS-2018.15>
- 384 4. Pettigrew LM, De Maeseneer J, Anderson M-IP, Essuman A, Kidd MR, Haines A. Primary  
385 health care and the Sustainable Development Goals. *The Lancet*. 2015;386: 2119–2121.  
386 doi:10.1016/S0140-6736(15)00949-6
- 387 5. UNDP. Goal 3: Good health and well-being | United Nations Development Programme. In:  
388 UNDP [Internet]. [cited 29 Jan 2024]. Available: [https://www.undp.org/sustainable-](https://www.undp.org/sustainable-development-goals/good-health)  
389 [development-goals/good-health](https://www.undp.org/sustainable-development-goals/good-health)
- 390 6. Mills A. Health Care Systems in Low- and Middle-Income Countries. *N Engl J Med*.  
391 2014;370: 552–557. doi:10.1056/NEJMra1110897
- 392 7. Cooper RA, Cooper MA, McGinley EL, Fan X, Rosenthal JT. Poverty, Wealth, and Health  
393 Care Utilization: A Geographic Assessment. *J Urban Health*. 2012;89: 828–847.  
394 doi:10.1007/s11524-012-9689-3

- 395 8. Gao Q, Prina AM, Ma Y, Aceituno D, Mayston R. Inequalities in Older age and Primary  
396 Health Care Utilization in Low- and Middle-Income Countries: A Systematic Review. *Int J*  
397 *Health Serv.* 2022;52: 99–114. doi:10.1177/00207314211041234
- 398 9. Susarla SM, Trimble M, Sokal-Gutierrez K. Cross-Sectional Analysis of Oral Healthcare vs.  
399 General Healthcare Utilization in Five Low- and Middle-Income Countries. *Front Oral*  
400 *Health.* 2022;3: 911110. doi:10.3389/froh.2022.911110
- 401 10. Smith RD, Hanson K, editors. *Health Systems in Low- and Middle-Income Countries: An*  
402 *economic and policy perspective.* Oxford University Press; 2011.  
403 doi:10.1093/acprof:oso/9780199566761.001.0001
- 404 11. Wang W, Temsah G, Mallick L. *Health insurance coverage and its impact on maternal health*  
405 *care utilization in low- and middle-income countries.* Rockville, Maryland, USA: ICF  
406 International; 2014. Available: <http://dhsprogram.com/pubs/pdf/AS45/AS45.pdf>
- 407 12. Kagaigai A, Anaeli A, Grepperud S, Mori AT. Healthcare utilization and catastrophic health  
408 expenditure in rural Tanzania: does voluntary health insurance matter? *BMC Public Health.*  
409 2023;23: 1567. doi:10.1186/s12889-023-16509-7
- 410 13. Bitton A, Fifield J, Ratcliffe H, Karlage A, Wang H, Veillard JH, et al. Primary healthcare  
411 system performance in low-income and middle-income countries: a scoping review of the  
412 evidence from 2010 to 2017. *BMJ Glob Health.* 2019;4: e001551. doi:10.1136/bmjgh-2019-  
413 001551
- 414 14. Kruk ME, Lewis TP, Arsenault C, Bhutta ZA, Irimu G, Jeong J, et al. Improving health and  
415 social systems for all children in LMICs: structural innovations to deliver high-quality  
416 services. *Lancet.* 2022;399: 1830–1844. doi:10.1016/S0140-6736(21)02532-0
- 417 15. Van Hees SGM, O’Fallon T, Hofker M, Dekker M, Polack S, Banks LM, et al. Leaving no  
418 one behind? Social inclusion of health insurance in low- and middle-income countries: a  
419 systematic review. *Int J Equity Health.* 2019;18: 134. doi:10.1186/s12939-019-1040-0
- 420 16. Patton GC, Coffey C, Cappa C, Currie D, Riley L, Gore F, et al. Health of the world’s  
421 adolescents: a synthesis of internationally comparable data. *The Lancet.* 2012;379: 1665–  
422 1675. doi:10.1016/S0140-6736(12)60203-7
- 423 17. Alegría M, NeMoyer A, Falgàs Bagué I, Wang Y, Alvarez K. Social Determinants of Mental  
424 Health: Where We Are and Where We Need to Go. *Curr Psychiatry Rep.* 2018;20: 95.  
425 doi:10.1007/s11920-018-0969-9
- 426 18. Delany-Moretlwe S, Cowan FM, Busza J, Bolton-Moore C, Kelley K, Fairlie L. Providing  
427 comprehensive health services for young key populations: needs, barriers and gaps. *J Int*  
428 *AIDS Soc.* 2015;18: 19833. doi:10.7448/IAS.18.2.19833
- 429 19. World Health Organization. Adolescent and young adult health. In: *Adolescent and young*  
430 *adult health* [Internet]. [cited 29 Jan 2024]. Available: [https://www.who.int/news-room/fact-](https://www.who.int/news-room/fact-sheets/detail/adolescents-health-risks-and-solutions)  
431 [sheets/detail/adolescents-health-risks-and-solutions](https://www.who.int/news-room/fact-sheets/detail/adolescents-health-risks-and-solutions)

- 432 20. Askari MdH, Gupta K. Understanding the health care utilization behavior to achieve the  
433 sustainable development goals—a comparative study of Malda District, India. *SN Soc Sci.*  
434 2022;2: 166. doi:10.1007/s43545-022-00474-w
- 435 21. The DHS Program - Country List. [cited 29 Jan 2024]. Available:  
436 <https://dhsprogram.com/Countries/Country-List.cfm>
- 437 22. World Bank Country and Lending Groups – World Bank Data Help Desk. [cited 5 Jan 2024].  
438 Available: [https://datahelpdesk.worldbank.org/knowledgebase/articles/906519-world-bank-](https://datahelpdesk.worldbank.org/knowledgebase/articles/906519-world-bank-country-and-lending-groups)  
439 [country-and-lending-groups](https://datahelpdesk.worldbank.org/knowledgebase/articles/906519-world-bank-country-and-lending-groups)
- 440 23. Institut National de la Statistique et de la Démographie and The DHS Program, The DHS  
441 Program. Burkina Faso Enquête Démographique et de Santé 2021. Burkina Faso et  
442 Rockville, Maryland, USA: INSD et ICF; 2023. Available:  
443 <https://www.dhsprogram.com/pubs/pdf/FR378/FR378.pdf>
- 444 24. Institut National de la Statistique, ICF. Côte d’Ivoire Enquête Démographique et de Santé  
445 2021 Rapport final. Rockville, Maryland, USA et la Côte d’Ivoire: INS et ICF; 2023.  
446 Available: <https://www.dhsprogram.com/pubs/pdf/FR385/FR385.pdf>
- 447 25. Ghana Statistical Service (GSS), The DHS Program. Ghana DHS 2022 - final report.  
448 Rockville, Maryland, USA: ICF; 2024. Available:  
449 <https://www.dhsprogram.com/pubs/pdf/FR387/FR387.pdf>
- 450 26. KNBS, ICF. Kenya Demographic and Health Survey 2022: Volume 1. Nairobi, Kenya, and  
451 Rockville, Maryland, USA: KNBS and ICF; 2023. Available:  
452 <https://www.dhsprogram.com/pubs/pdf/FR380/FR380.pdf>
- 453 27. Ministry of Health [Tanzania Mainland], Ministry of Health [Zanzibar], National Bureau of  
454 Statistics (NBS), Office of the Chief Government Statistician (OCGS), ICF. Tanzania  
455 demographic and health survey 2022 - final report. Rockville, Maryland, USA: ICF; 2023.  
456 Available: <https://www.dhsprogram.com/pubs/pdf/FR382/FR382.pdf>
- 457 28. National Institute of Statistics, Ministry of Health, The DHS Program. Cambodia  
458 Demographic and Health Survey 2021-22. Phnom Penh, Cambodia, and Rockville,  
459 Maryland, USA: NIS, MoH, and ICF; 2023. Available:  
460 <https://www.dhsprogram.com/pubs/pdf/FR377/FR377.pdf>
- 461 29. Ministry of Health and Population [Nepal], ICF. Nepal Demographic and Health Survey 2022.  
462 Kathmandu, Nepal: Ministry of Health and Population [Nepal]; 2023. Available:  
463 <https://www.dhsprogram.com/pubs/pdf/FR379/FR379.pdf>
- 464 30. Philippine Statistics Authority (PSA), ICF. Philippine National Demographic and Health  
465 Survey (NDHS): Final Report. Quezon City, Philippines, and Rockville, Maryland, USA:  
466 PSA and ICF; 2023. Available: <https://www.dhsprogram.com/pubs/pdf/FR381/FR381.pdf>
- 467 31. The DHS Program - Data Collection. [cited 18 Jan 2024]. Available:  
468 <https://dhsprogram.com/data/data-collection.cfm>



- 469 32. Rosenstock IM. Why People Use Health Services. *Milbank Quarterly*. 2005;83.  
470 doi:10.1111/j.1468-0009.2005.00425.x
- 471 33. Elkasabi M. Sampling and Weighting with DHS Data. In: *The DHS Program Blog* [Internet].  
472 16 Sep 2015 [cited 4 Jan 2024]. Available: [http://blog.dhsprogram.com/sampling-weighting-](http://blog.dhsprogram.com/sampling-weighting-at-dhs/)  
473 [at-dhs/](http://blog.dhsprogram.com/sampling-weighting-at-dhs/)
- 474 34. Evans MV, Andréambelason T, Randriamihaja M, Ihantamalala F, Cordier L, Cowley G, et  
475 al. Geographic barriers to care persist at the community healthcare level: Evidence from rural  
476 Madagascar. *PLOS Glob Public Health*. 2022;2: e0001028.  
477 doi:10.1371/journal.pgph.0001028
- 478 35. Melendro M, Campos G, Rodríguez-Bravo AE, Arroyo Resino D. Young People's  
479 Autonomy and Psychological Well-Being in the Transition to Adulthood: A Pathway  
480 Analysis. *Front Psychol*. 2020;11: 1946. doi:10.3389/fpsyg.2020.01946
- 481 36. Wood D, Crapnell T, Lau L, Bennett A, Lotstein D, Ferris M, et al. Emerging Adulthood as  
482 a Critical Stage in the Life Course. In: Halfon N, Forrest CB, Lerner RM, Faustman EM,  
483 editors. *Handbook of Life Course Health Development*. Cham: Springer International  
484 Publishing; 2018. pp. 123–143. doi:10.1007/978-3-319-47143-3\_7
- 485 37. Munakampe MN, Zulu JM, Michelo C. Contraception and abortion knowledge, attitudes and  
486 practices among adolescents from low and middle-income countries: a systematic review.  
487 *BMC Health Serv Res*. 2018;18: 909. doi:10.1186/s12913-018-3722-5
- 488 38. Liu C, Wang D, Liu C, Jiang J, Wang X, Chen H, et al. What is the meaning of health literacy?  
489 A systematic review and qualitative synthesis. *Fam Med Community Health*. 2020;8:  
490 e000351. doi:10.1136/fmch-2020-000351
- 491 39. Institute of Medicine (US) Committee on Health Literacy, Nielsen-Bohlman L, Panzer AM,  
492 Kindig DA. Executive summary. Washington, D.C., DC: National Academies Press; 2004.  
493 Available: <https://www.ncbi.nlm.nih.gov/books/NBK216029/>
- 494 40. Samuel Yalew Adela, Laurie Armstrong. Addressing the Learning Needs of Africa's Youth  
495 - Mastercard Foundation. [cited 29 Jan 2024]. Available: [https://mastercardfdn.org/learning-](https://mastercardfdn.org/learning-needs-of-africa-youth/)  
496 [needs-of-africa-youth/](https://mastercardfdn.org/learning-needs-of-africa-youth/)
- 497 41. Raghupathi V, Raghupathi W. The influence of education on health: an empirical assessment  
498 of OECD countries for the period 1995-2015. *Arch Public Health*. 2020;78: 20.  
499 doi:10.1186/s13690-020-00402-5
- 500 42. Culture Of Burkina Faso | Discover Burkina-Faso. 3 May 2020 [cited 29 Jan 2024].  
501 Available: <https://discover-burkinafaso.com/culture-languages-religions/>
- 502 43. Ssewanyana D, Abubakar A, Newton CRJC, Otiende M, Mochamah G, Nyundo C, et al.  
503 Clustering of health risk behaviors among adolescents in Kilifi, Kenya, a rural Sub-Saharan  
504 African setting. *PLoS One*. 2020;15: e0242186. doi:10.1371/journal.pone.0242186

- 505 44. Seposo X. Developmental Changes in the Philippine Health System: Accomplishments,  
506 Successes and Challenges. *Healthcare (Basel)*. 2019;7: 116. doi:10.3390/healthcare7040116
- 507 45. Zon H, Pavlova M, Groot W. Factors associated with access to healthcare in Burkina Faso:  
508 evidence from a national household survey. *BMC Health Serv Res*. 2021;21: 148.  
509 doi:10.1186/s12913-021-06145-5
- 510 46. Bicaba F, Druetz T. In Burkina Faso healthcare is free only for some: why this is a problem.  
511 In: *The Conversation* [Internet]. 30 Nov 2021 [cited 29 Jan 2024]. Available:  
512 [http://theconversation.com/in-burkina-faso-healthcare-is-free-only-for-some-why-this-is-a-](http://theconversation.com/in-burkina-faso-healthcare-is-free-only-for-some-why-this-is-a-problem-172098)  
513 [problem-172098](http://theconversation.com/in-burkina-faso-healthcare-is-free-only-for-some-why-this-is-a-problem-172098)
- 514 47. Naher N, Hoque R, Hassan MS, Balabanova D, Adams AM, Ahmed SM. The influence of  
515 corruption and governance in the delivery of frontline health care services in the public sector:  
516 a scoping review of current and future prospects in low and middle-income countries of south  
517 and south-east Asia. *BMC Public Health*. 2020;20: 880. doi:10.1186/s12889-020-08975-0
- 518 48. Kruk ME, Gage AD, Arsenault C, Jordan K, Leslie HH, Roder-DeWan S, et al. High-quality  
519 health systems in the Sustainable Development Goals era: time for a revolution. *Lancet Glob*  
520 *Health*. 2018;6: e1196–e1252. doi:10.1016/S2214-109X(18)30386-3
- 521 49. Access to care under serious threat in Ivory Coast - Côte d'Ivoire | ReliefWeb. 25 Mar 2011  
522 [cited 29 Jan 2024]. Available: [https://reliefweb.int/report/c%C3%B4te-divoire/access-care-](https://reliefweb.int/report/c%C3%B4te-divoire/access-care-under-serious-threat-ivory-coast)  
523 [under-serious-threat-ivory-coast](https://reliefweb.int/report/c%C3%B4te-divoire/access-care-under-serious-threat-ivory-coast)

524

**Table 2: Demographic Characteristics of Individuals**

| Characteristics                         | Sub-Saharan Africa Region |                        |                |                |                   | Southeast Asian Region |                |                     |  |
|-----------------------------------------|---------------------------|------------------------|----------------|----------------|-------------------|------------------------|----------------|---------------------|--|
|                                         | Burkina Faso<br>N (%)     | Côte d'Ivoire<br>N (%) | Ghana<br>N (%) | Kenya<br>N (%) | Tanzania<br>N (%) | Cambodia<br>N (%)      | Nepal<br>N (%) | Philippine<br>N (%) |  |
| <b>Youth Age group</b>                  |                           |                        |                |                |                   |                        |                |                     |  |
| 15-19 year                              | 3846 (54.26)              | 3176 (54.15)           | 2672 (49.81)   | 3122 (50.52)   | 3078 (53.05)      | 2966 (53.42)           | 2637 (50.06)   | 5513 (54.16)        |  |
| 20-24 year                              | 3242(45.74)               | 2690 (45.85)           | 2692 (50.19)   | 3057 (49.48)   | 2724 (46.95)      | 2586 (46.58)           | 2631 (49.94)   | 4666 (45.84)        |  |
| <b>Resident</b>                         |                           |                        |                |                |                   |                        |                |                     |  |
| Urban                                   | 2492 (35.16)              | 3867 (65.91)           | 3002 (55.97)   | 2424 (39.23)   | 2072 (35.71)      | 2261 (40.72)           | 3587 (68.09)   | 5492 (53.95)        |  |
| Rural                                   | 4596 (64.84)              | 1999 (34.09)           | 2362 (44.03)   | 3755 (60.77)   | 3730 (64.29)      | 3291 (59.28)           | 1681 (31.91)   | 4687 (46.05)        |  |
| <b>Wealth Index</b>                     |                           |                        |                |                |                   |                        |                |                     |  |
| Middle                                  | 1304 (18.40)              | 1189 (20.28)           | 1221 (22.77)   | 1145 (18.51)   | 1107 (19.09)      | 1129 (20.34)           | 1058 (20.07)   | 2117 (20.80)        |  |
| Poor                                    | 2377 (33.53)              | 1765 (30.09)           | 1967 (36.67)   | 2265 (36.65)   | 1917 (33.04)      | 2026 (36.50)           | 2086 (39.61)   | 3627 (35.63)        |  |
| Rich                                    | 3407 (48.07)              | 2912 (49.63)           | 2176 (40.56)   | 2769 (44.81)   | 2778 (47.87)      | 2397 (43.16)           | 2124 (40.32)   | 4435 (43.57)        |  |
| <b>Education</b>                        |                           |                        |                |                |                   |                        |                |                     |  |
| No Education                            | 2548 (35.93)              | 2001 (34.12)           | 292 (5.46)     | 160 (2.60)     | 635 (10.95)       | 151 (2.73)             | 362 (6.88)     | 33 (0.33)           |  |
| Primary                                 | 1298 (18.31)              | 959 (16.35)            | 651 (12.14)    | 1590 (25.74)   | 2547 (43.90)      | 1197 (21.57)           | 1673 (31.77)   | 296 (2.91)          |  |
| Secondary                               | 3106 (43.83)              | 2644 (45.08)           | 2644 (45.08)   | 4108 (76.58)   | 3434 (55.56)      | 2581 (44.46)           | 3732 (67.19)   | 3123 (59.28)        |  |
| Higher                                  | 136 (1.93)                | 262 (4.45)             | 313 (5.82)     | 995 (16.10)    | 39 (0.69)         | 472 (8.51)             | 110 (2.08)     | 2841 (27.90)        |  |
| <b>Has Access to Personal Transport</b> |                           |                        |                |                |                   |                        |                |                     |  |
| No                                      | 1093 (15.43)              | 4448 (75.84)           | 4089 (76.24)   | 5064 (81.95)   | 4029 (69.43)      | 2609 (47.00)           | 3156 (59.92)   | 7256 (71.28)        |  |
| Yes                                     | 5995 (84.57)              | 1418 (24.16)           | 1275 (23.76)   | 1115 (18.05)   | 1773 (30.57)      | 2943 (53.00)           | 2112 (40.08)   | 2923 (28.72)        |  |
| <b>Media Engagement</b>                 |                           |                        |                |                |                   |                        |                |                     |  |
| No                                      | 2075 (29.27)              | 1499 (25.57)           | 1177 (21.93)   | 1550 (25.08)   | 2329 (40.15)      | 2135 (38.46)           | 2229 (42.31)   | 1298 (12.76)        |  |
| Yes                                     | 5013 (70.73)              | 1417 (24.16)           | 4187 (78.07)   | 4629 (74.92)   | 3473 (59.85)      | 3417 (61.54)           | 3039 (57.69)   | 8881 (87.24)        |  |
| <b>Nearby Healthcare Reaching time</b>  |                           |                        |                |                |                   |                        |                |                     |  |
| Within 1 hour                           | 6245 (88.11)              | 5623 (95.86)           | 5154 (96.07)   | 5801 (93.88)   | 5167 (89.04)      | 5499 (99.03)           | 5085 (96.52)   | 10118 (99.39)       |  |
| Within 2-3 Hour                         | 633 (8.93)                | 227 (3.87)             | 201 (3.76)     | 346 (5.60)     | 578 (9.97)        | 46 (0.84)              | 174 (3.31)     | 52 (0.51)           |  |
| More than 3 Hour                        | 210 (2.96)                | 16 (0.27)              | 9 (0.17)       | 32 (0.52)      | 57 (0.99)         | 7 (0.13)               | 9 (0.17)       | 9 (0.09)            |  |

**Table 3: Association between Influencing Factors and Healthcare Utilization**

| Characteristics                         | Sub-Saharan Africa Region |              |               |              |              |              |              |              |              |              | Southeast Asia |              |              |               |              |              |  |  |
|-----------------------------------------|---------------------------|--------------|---------------|--------------|--------------|--------------|--------------|--------------|--------------|--------------|----------------|--------------|--------------|---------------|--------------|--------------|--|--|
|                                         | Burkina Faso              |              | Côte d'Ivoire |              | Ghana        |              | Kenya        |              | Tanzania     |              | Cambodia       |              | Nepal        |               | Philippine   |              |  |  |
|                                         | No (N%)                   | Yes (N%)     | No (N%)       | Yes (N%)     | No (N%)      | Yes (N%)     | No (N%)      | Yes (N%)     | No (N%)      | Yes (N%)     | No (N%)        | Yes (N%)     | No (N%)      | Yes (N%)      | No (N%)      | Yes (N%)     |  |  |
| <b>Youth Age group</b>                  |                           |              |               |              |              |              |              |              |              |              |                |              |              |               |              |              |  |  |
| 15-19 year                              | 2281 (70.63)              | 1564 (40.55) | 2234 (63.82)  | 941 (39.83)  | 1845 (58.82) | 826 (37.12)  | 1955 (60.60) | 1167 (39.52) | 2068 (64.48) | 1010 (38.93) | 2338 (58.90)   | 628 (39.68)  | 1202 (65.53) | 1434 (41.78)  | 4883 (58.41) | 630 (34.63)  |  |  |
| 20-24 year                              | 948 (29.37)               | 2293 (59.45) | 1266 (36.18)  | 1422 (60.17) | 1292 (41.18) | 1399 (62.88) | 1271 (39.40) | 1786 (60.48) | 1139 (35.52) | 1585 (61.07) | 1631 (41.10)   | 955 (60.32)  | 1631 (34.47) | 1998 (58.22)  | 3477 (41.59) | 1189 (65.37) |  |  |
| <b>Resident</b>                         |                           |              |               |              |              |              |              |              |              |              |                |              |              |               |              |              |  |  |
| Urban                                   | 1148 (35.57)              | 1343 (34.82) | 2345 (66.98)  | 1520 (64.31) | 1784 (56.87) | 1217 (54.71) | 1241 (38.48) | 1182 (40.05) | 1132 (35.30) | 940 (36.22)  | 1705 (42.96)   | 555 (35.10)  | 1227 (66.88) | 2359 (68.74)  | 4627 (55.34) | 865 (47.57)  |  |  |
| Rural                                   | 2080 (64.43)              | 2514 (65.18) | 1155 (33.02)  | 843 (35.69)  | 1353 (43.13) | 1008 (45.29) | 1985 (61.52) | 1770 (59.95) | 2075 (64.70) | 1655 (63.78) | 2264 (57.04)   | 264 (64.90)  | 1027 (33.12) | 1073 (31.26)  | 3733 (44.66) | 953 (52.43)  |  |  |
| <b>Wealth Index</b>                     |                           |              |               |              |              |              |              |              |              |              |                |              |              |               |              |              |  |  |
| Middle                                  | 566 (17.53)               | 738 (19.13)  | 732 (20.92)   | 457 (19.34)  | 702 (22.39)  | 518 (23.31)  | 603 (18.71)  | 541 (18.35)  | 627 (19.57)  | 480 (18.50)  | 794 (20.02)    | 334 (21.15)  | 362 (19.77)  | 694 (20.24)   | 1732 (20.72) | 384 (21.13)  |  |  |
| Poor                                    | 1137 (35.23)              | 1238 (32.10) | 1041 (29.75)  | 723 (30.60)  | 1161 (36.99) | 806 (36.22)  | 1254 (38.89) | 1010 (32.85) | 1053 (32.85) | 864 (33.28)  | 1326 (33.42)   | 699 (44.20)  | 743 (40.53)  | 1343 (39.12)  | 2878 (34.43) | 748 (41.16)  |  |  |
| Rich                                    | 1525 (47.24)              | 1881 (48.76) | 1727 (49.33)  | 1183 (50.07) | 1274 (40.61) | 900 (40.47)  | 1368 (42.41) | 1401 (47.44) | 1526 (47.58) | 1251 (48.22) | 1847 (46.55)   | 548 (34.66)  | 728 (39.70)  | 1395 (40.64)  | 3749 (44.85) | 686 (37.71)  |  |  |
| <b>Education</b>                        |                           |              |               |              |              |              |              |              |              |              |                |              |              |               |              |              |  |  |
| No Education                            | 1029 (31.87)              | 1517 (39.32) | 1209 (34.55)  | 791 (33.49)  | 156 (4.97)   | 136 (6.13)   | 112 (3.48)   | 48.24 (1.63) | 368 (11.50)  | 266 (10.28)  | 105 (2.65)     | 46 (2.93)    | 117 (6.38)   | 245 (7.15)    | 29 (0.35)    | 4 (0.26)     |  |  |
| Primary                                 | 645 (19.99)               | 652 (16.90)  | 545 (15.57)   | 414 (17.52)  | 403 (12.87)  | 247 (11.11)  | 909 (28.18)  | 681 (23.07)  | 1366 (42.62) | 1180 (45.48) | 778 (19.61)    | 419 (26.47)  | 584 (31.83)  | 1089 (31.74)  | 206 (2.46)   | 90 (4.98)    |  |  |
| Secondary                               | 1507 (46.67)              | 1599 (41.46) | 1623 (46.37)  | 1020 (43.17) | 2428 (77.37) | 1679 (75.47) | 1752 (54.31) | 1681 (56.93) | 1457 (45.45) | 1122 (43.23) | 2725 (68.67)   | 1005 (63.47) | 1106 (60.29) | 81 (2.38)     | 5814 (69.55) | 1194 (65.68) |  |  |
| Higher                                  | 47 (1.47)                 | 89 (2.32)    | 123 (3.52)    | 137 (5.83)   | 150 (4.78)   | 162 (7.290)  | 452 (14.04)  | 542 (918.36) | 13 (0.43)    | 26 (1.01)    | 359 (9.07)     | 112 (7.130)  | 27 (1.50)    | 27 (27.64)    | 529 (27.64)  | 29 (29.08)   |  |  |
| <b>Has Access to Personal Transport</b> |                           |              |               |              |              |              |              |              |              |              |                |              |              |               |              |              |  |  |
| No                                      | 463 (14.34)               | 630 (16.34)  | 2648 (75.63)  | 1800 (76.14) | 2389 (76.15) | 1699 (76.36) | 2637 (81.73) | 2427 (82.18) | 2170 (67.66) | 1859 (71.62) | 1729 (43.56)   | 880 (55.63)  | 1054 (57.43) | 2102 (61.260) | 5957 (71.25) | 1298 (71.39) |  |  |
| Yes                                     | 2766 (85.66)              | 3228 (83.66) | 853 (24.37)   | 564 (23.86)  | 748 (23.85)  | 526 (23.64)  | 589 (18.27)  | 526 (17.82)  | 1037 (32.34) | 736 (28.38)  | 2240 (56.44)   | 702 (44.37)  | 781 (42.57)  | 1330 (38.74)  | 2403 (28.75) | 520 (28.61)  |  |  |
| <b>Media Engagement</b>                 |                           |              |               |              |              |              |              |              |              |              |                |              |              |               |              |              |  |  |
| No                                      | 903 (27.97)               | 1171 (30.36) | 885 (25.30)   | 613 (25.96)  | 692 (22.07)  | 484 (21.75)  | 845 (26.21)  | 704 (23.84)  | 1301 (40.58) | 1028 (39.62) | 1483 (37.37)   | 652 (41.21)  | 756 (41.20)  | 1473 (42.91)  | 1007 (291)   | 291 (16.02)  |  |  |
| Yes                                     | 2326 (72.03)              | 2687 (69.64) | 2615 (74.70)  | 1750 (74.04) | 2445 (77.93) | 1741 (78.25) | 2380 (73.79) | 2249 (76.16) | 1905 (59.42) | 1567 (60.38) | 2486 (62.63)   | 930 (58.79)  | 1079 (58.80) | 1960 (57.09)  | 7353 (87.95) | 1527 (83.98) |  |  |
| <b>Nearby Healthcare Reaching time</b>  |                           |              |               |              |              |              |              |              |              |              |                |              |              |               |              |              |  |  |
| Within 1 hour                           | 2845 (88.10)              | 3400 (88.12) | 3350 (95.70)  | 2272 (96.10) | 3006 (95.81) | 2146 (96.43) | 3012 (93.34) | 2790 (94.47) | 2857 (89.08) | 2310 (88.99) | 3938 (99.23)   | 1560 (98.53) | 1769 (96.43) | 3315 (96.57)  | 8306 (99.35) | 1811 (99.59) |  |  |
| Within 2-3 Hour                         | 290 (8.99)                | 342 (8.88)   | 136 (3.91)    | 90 (3.81)    | 128 (4.10)   | 73 (0.28)    | 194 (6.04)   | 150 (5.11)   | 268 (9.68)   | 25 (10.34)   | 21 (0.64)      | 21 (1.34)    | 59 (3.22)    | 115 (3.36)    | 46 (0.55)    | 6 (0.33)     |  |  |
| More than 3 Hour                        | 94 (2.92)                 | 115 (3.00)   | 13 (0.39)     | 2 (0.10)     | 3 (0.09)     | 6.20 (0.28)  | 19 (0.62)    | 12 (0.42)    | 39 (0.67)    | 5 (0.13)     | 2 (0.33)       | 2 (0.33)     | 6 (0.35)     | 2 (0.07)      | 8 (0.10)     | 1 (0.08)     |  |  |

Denote: Chi<sup>2</sup> significance: Ψ = P-value<0.05, ΨΨ = P-value<0.01, ΨΨΨ = P-value<0.001

**Table 4: Association between Residence and Time Required to Reach Nearby Healthcare Facilities**

| REACHING TIME<br>NEAREST HEALTHCARE | SUB-SAHARAN AFRICA REGION            |                 |                                       |                 |                               |                 |                               |                 | SOUTHEAST ASIA                   |                 |                                  |                 |                               |                 |                                  |                 |
|-------------------------------------|--------------------------------------|-----------------|---------------------------------------|-----------------|-------------------------------|-----------------|-------------------------------|-----------------|----------------------------------|-----------------|----------------------------------|-----------------|-------------------------------|-----------------|----------------------------------|-----------------|
|                                     | Burkina Faso<br><i>p</i> =0.000 **** |                 | Côte d'Ivoire<br><i>p</i> =0.000 **** |                 | Ghana<br><i>p</i> =0.000 **** |                 | Kenya<br><i>p</i> =0.000 **** |                 | Tanzania<br><i>p</i> =0.000 **** |                 | Cambodia<br><i>p</i> =0.000 **** |                 | Nepal<br><i>p</i> =0.000 **** |                 | Philippine<br><i>p</i> =0.002 ** |                 |
|                                     | Urban                                | Rural           | Urban                                 | Rural           | Urban                         | Rural           | Urban                         | Rural           | Urban                            | Rural           | Urban                            | Rural           | Urban                         | Rural           | Urban                            | Rural           |
|                                     | N (%)                                | N (%)           | N (%)                                 | N (%)           | N (%)                         | N (%)           | N (%)                         | N (%)           | N (%)                            | N (%)           | N (%)                            | N (%)           | N (%)                         | N (%)           | N (%)                            | N (%)           |
| <b>1 HOUR</b>                       | 2424<br>(97.29)                      | 3820<br>(83.13) | 3776<br>(97.69)                       | 1846<br>(92.34) | 2954<br>(98.40)               | 2199<br>(93.11) | 2370<br>(97.76)               | 3432<br>(91.38) | 2021<br>(97.53)                  | 3146<br>(84.32) | 2256<br>(99.81)                  | 3242<br>(98.50) | 3501<br>(97.62)               | 1583<br>(94.17) | 5471<br>(99.62)                  | 4646<br>(99.13) |
| <b>2-3 HOURS</b>                    | 22<br>(0.91)                         | 610<br>(13.28)  | 81<br>(2.10)                          | 145<br>(7.29)   | 46<br>(1.53)                  | 155<br>(6.59)   | 53<br>(2.21)                  | 292<br>(7.78)   | 46<br>(2.22)                     | 532<br>(14.28)  | 2<br>(0.08)                      | 44<br>(1.36)    | 81<br>(2.28)                  | 92<br>(5.53)    | 15<br>(0.28)                     | 37<br>(0.79)    |
| <b>MORE THAN 3 HOURS</b>            | 44<br>(1.80)                         | 164<br>(3.59)   | 8<br>(0.21)                           | 7<br>(0.38)     | 2<br>(0.07)                   | 6<br>(0.29)     | 1<br>(0.04)                   | 31<br>(0.84)    | 5<br>(0.25)                      | 52<br>(1.40)    | 2<br>(0.11)                      | 4<br>(0.14)     | 3<br>(0.11)                   | 4<br>(0.30)     | 5<br>(0.11)                      | 3<br>(0.08)     |

Denote: Chi<sup>2</sup> significance: \* = *P*-value<0.05, \*\* = *P*-value<0.01, \*\*\*\* = *P*-value<0.001)

**Table 5: Influencing Factors of Healthcare Utilization among Female Youth Groups in Low and Lower-middle-income Countries**

| CHARACTERISTICS                  | SUB-SAHARAN AFRICA REGION |              |               |              |       |              |       |              |          |              | SOUTHEAST ASIA |              |       |              |            |              |
|----------------------------------|---------------------------|--------------|---------------|--------------|-------|--------------|-------|--------------|----------|--------------|----------------|--------------|-------|--------------|------------|--------------|
|                                  | Burkina Faso              |              | Côte d'Ivoire |              | Ghana |              | Kenya |              | Tanzania |              | Cambodia       |              | Nepal |              | Philippine |              |
| YOUTH AGE GROUP                  | AOR                       | CI           | AOR           | CI           | AOR   | CI           | AOR   | CI           | AOR      | CI           | AOR            | CI           | AOR   | CI           | AOR        | CI           |
| 15-19 YEAR                       | Ref                       |              | Ref           |              | Ref   |              | Ref   |              | Ref      |              | Ref            |              | Ref   |              | Ref        |              |
| 20-24 YEAR                       | 3.44                      | 3.04-3.89*** | 2.75          | 2.39-3.17*** | 2.41  | 2.08-2.76*** | 2.46  | 2.11-2.87*** | 2.93     | 2.55-3.37*** | 2.25           | 1.91-2.64*** | 2.64  | 2.32-3.01*** | 3.87       | 3.22-4.64*** |
| RESIDENT                         |                           |              |               |              |       |              |       |              |          |              |                |              |       |              |            |              |
| URBAN                            | Ref                       |              | Ref           |              | Ref   |              | Ref   |              | Ref      |              | Ref            |              | Ref   |              | Ref        |              |
| RURAL                            | 1.18                      | 0.99-1.40    | 1.17          | 0.98-1.38    | 1.18  | 0.99-1.39    | 1.24  | 1.00-1.53*   | 0.99     | 0.79-1.23    | 1.14           | 0.94-1.41    | 0.93  | 0.80-1.08    | 1.41       | 1.17-1.70*** |
| WEALTH INDEX                     |                           |              |               |              |       |              |       |              |          |              |                |              |       |              |            |              |
| MIDDLE                           | Ref                       |              | Ref           |              | Ref   |              | Ref   |              | Ref      |              | Ref            |              | Ref   |              | Ref        |              |
| POOR                             | 0.73                      | 0.62-0.87*** | 1.07          | 0.88-1.31    | 0.91  | 0.74-1.10    | 0.97  | 0.80-1.18    | 1.11     | 0.90-1.37    | 1.21           | 0.99-1.49    | 0.91  | 0.75-1.11    | 1.03       | 0.83-1.27    |
| RICH                             | 1.01                      | 0.84-1.19    | 1.14          | 0.93-1.39    | 0.92  | 0.75-1.12    | 1.13  | 0.91-1.41    | 0.93     | 0.75-1.16    | 0.73           | 0.59-0.92**  | 0.96  | 0.78-1.18    | 0.91       | 0.74-1.12    |
| EDUCATION                        |                           |              |               |              |       |              |       |              |          |              |                |              |       |              |            |              |
| NO EDUCATION                     | Ref                       |              | Ref           |              | Ref   |              | Ref   |              | Ref      |              | Ref            |              | Ref   |              | Ref        |              |
| PRIMARY                          | 0.84                      | 0.72-0.98*   | 1.22          | 0.93-1.60    | 0.88  | 0.64-1.21    | 2.07  | 1.50-2.85*** | 1.36     | 1.09-1.68**  | 1.55           | 1.01-2.37*   | 1.05  | 0.75-1.47    | 3.46       | 0.99-12.05   |
| SECONDARY                        | 0.83                      | 0.73-0.95*   | 1.31          | 1.07-1.57**  | 0.92  | 0.70-1.20    | 2.58  | 1.88-3.54*** | 1.42     | 1.11-1.80**  | 1.41           | 0.92-2.10    | 0.96  | 0.68-1.35    | 2.32       | 0.70-7.67    |
| HIGHER                           | 0.79                      | 0.51-1.24    | 1.37          | 0.92-2.06    | 1.05  | 0.66-1.66    | 2.16  | 1.48-3.17*** | 1.91     | 0.88-4.07    | 0.97           | 0.58-1.62    | 0.92  | 0.46-1.87    | 1.16       | 0.34-3.94    |
| HAS ACCESS TO PERSONAL TRANSPORT |                           |              |               |              |       |              |       |              |          |              |                |              |       |              |            |              |
| NO                               | Ref                       |              | Ref           |              | Ref   |              | Ref   |              | Ref      |              | Ref            |              | Ref   |              | Ref        |              |
| YES                              | 0.89                      | 0.74-1.06    | 0.99          | 0.84-1.18    | 0.99  | 0.83-1.18    | 0.99  | 0.82-1.20    | 0.84     | 0.72-0.99*   | 0.71           | 0.59-0.82*** | 0.85  | 0.73-1.01    | 1.11       | 0.91-1.31    |
| MEDIA ENGAGEMENT                 |                           |              |               |              |       |              |       |              |          |              |                |              |       |              |            |              |
| NO                               | Ref                       |              | Ref           |              | Ref   |              | Ref   |              | Ref      |              | Ref            |              | Ref   |              | Ref        |              |
| YES                              | 0.86                      | 0.75-1.01    | 0.95          | 0.79-1.15    | 1.06  | 0.90-1.26    | 1.02  | 0.87-1.20    | 1.14     | 0.98-1.33    | 1.11           | 0.93-1.31    | 0.94  | 0.80-1.10    | 0.83       | 0.65-1.05    |
| NEARBY HEALTHCARE REACHING TIME  |                           |              |               |              |       |              |       |              |          |              |                |              |       |              |            |              |
| WITHIN 1 HOUR                    | Ref                       |              | Ref           |              | Ref   |              | Ref   |              | Ref      |              | Ref            |              | Ref   |              | Ref        |              |
| WITHIN 2-3 HOUR                  | 0.96                      | 0.77-1.19    | 0.88          | 0.63-1.25    | 0.77  | 0.53-1.12    | 0.98  | 0.75-1.29    | 1.11     | 0.86-1.43    | 1.43           | 0.77-2.65    | 0.97  | 0.71-1.31    | 0.49       | 0.23-1.06    |
| MORE THAN 3 HOUR                 | 1.01                      | 0.65-1.59    | 0.27          | 0.11-0.67**  | 3.13  | 0.90-10.77   | 0.94  | 0.52-1.72    | 0.51     | 0.20-1.27    | 1.01           | 0.25-3.99    | 0.18  | 0.02-1.18    | 0.81       | 0.20-3.26    |

Denote: *P*-value indication: \* = *P*-value<0.05, \*\* = *P*-value<0.01, \*\*\* = *P*-value<0.001, AOR=adjusted odds ratio)
